# Supplementary material for: Genetic polymorphisms in glycolytic pathway are associated with the prognosis of patients with early stage non-small cell lung cancer
Source: PubMed Central journal article supplement (PMC5073284; doi:10.1038/srep35603), 2016-10-21
Supplement: srep35603-s1.pdf [file srep35603-s1.pdf]

## **Genetic polymorphisms in glycolytic pathway are associated with the prognosis of patients with early stage non-small cell lung cancer**

Shin Yup Lee<sup>1,2,\*</sup>, Cheng Cheng Jin<sup>3,4,\*</sup>, Jin Eun Choi<sup>3,5</sup>, Mi Jeong Hong<sup>3,4</sup>, Deuk Kju Jung<sup>3,4</sup>, Sook Kyung Do<sup>3,4</sup>, Sun Ah Baek<sup>3</sup>, Hyo Jung Kang<sup>3</sup>, Hyo-Gyoung Kang<sup>3,5</sup>, Sun Ha Choi<sup>2</sup>, Won Kee Lee<sup>6</sup>, Yangki Seok<sup>1,7</sup>, Eung Bae Lee<sup>1,7</sup>, Ji Yun Jeong<sup>8</sup>, Kyung Min Shin<sup>9</sup>, Sukki Cho<sup>10</sup>, Seung Soo Yoo<sup>1,2</sup>, Jaehee Lee<sup>2</sup>, Seung Ick Cha<sup>2</sup>, Chang Ho Kim<sup>2</sup>, You Mie Lee<sup>11</sup>, In-Kyu Lee<sup>2</sup>, Sanghoon Jheon<sup>10</sup> & Jae Yong Park<sup>1,2,3,4,5</sup>

<sup>1</sup>Lung Cancer Center, Kyungpook National University Medical Center, Daegu 41404, Republic of Korea. <sup>2</sup>Departments of Internal Medicine, School of Medicine, Kyungpook National University, Daegu 41944, Republic of Korea. <sup>3</sup>Department of Biochemistry and Cell Biology, School of Medicine, Kyungpook National University, Daegu 41944, Republic of Korea. <sup>4</sup>BK21 Plus KNU Biomedical Convergence Program, Department of Biomedical Science, Kyungpook National University, Daegu 41944, Republic of Korea. <sup>5</sup>Cell and Matrix Research Institute, School of Medicine, Kyungpook National University, Daegu 41944, Republic of Korea. <sup>6</sup>Biostatistics Center, School of Medicine, Kyungpook National University, Daegu 41944, Republic of Korea. <sup>7</sup>Department of Thoracic Surgery, School of Medicine, Kyungpook National University, Daegu 41944, Republic of Korea. <sup>8</sup>Department of Pathology, School of Medicine, Kyungpook National University, Daegu 41944, Republic of Korea. <sup>9</sup>Department of Radiology, School of Medicine, Kyungpook National University, Daegu 41944, Republic of Korea. <sup>10</sup>Department of Thoracic and Cardiovascular Surgery, Seoul National University School of Medicine, Seoul 13620, Republic of Korea, <sup>11</sup>College of Pharmacy, Kyungpook National University, Daegu, 41566, Republic of Korea;

\*These authors contributed equally to this work. Correspondence and requests for materials should be addressed to S.Y.L. (email: [shinyup@knu.ac.kr](mailto:shinyup@knu.ac.kr)) or J.Y.P. (email: [jaeyong@knu.ac.kr](mailto:jaeyong@knu.ac.kr))

Supplementary Table 1. List of analyzed SNPs and the association with survival outcomes.

| SNP ID     | Gene   | Base change | MAF  | $P^a$ for Overall survival |           |            | $P^a$ for Disease-free survival |           |            |
|------------|--------|-------------|------|----------------------------|-----------|------------|---------------------------------|-----------|------------|
|            |        |             |      | Dominant                   | Recessive | Codominant | Dominant                        | Recessive | Codominant |
| rs2274971  | ENO1   | A>G         | 0.23 | 0.02                       | 0.16      | 0.02       | 0.01                            | 0.40      | 0.02       |
| rs11168417 | PFKM   | C>T         | 0.22 | 0.02                       | 0.82      | 0.05       | 0.04                            | 0.76      | 0.10       |
| rs1132173  | PFKP   | C>T         | 0.47 | 0.72                       | 0.11      | 0.24       | 0.74                            | 0.02      | 0.12       |
| rs3785921  | PDK2   | G>A         | 0.33 | 0.10                       | 0.39      | 0.10       | 0.003                           | 0.22      | 0.01       |
| rs7971637  | GAPDH  | C>T         | 0.28 | 0.17                       | 0.05      | 0.05       | 0.24                            | 0.10      | 0.10       |
| rs2986408  | PDHX   | A>C         | 0.15 | 0.35                       | 0.31      | 0.26       | 0.43                            | 0.10      | 0.23       |
| rs2071064  | TPI1   | C>T         | 0.30 | 0.08                       | 0.51      | 0.30       | 0.44                            | 0.87      | 0.61       |
| rs8192431  | PKM    | C>T         | 0.36 | 0.83                       | 0.31      | 0.72       | 0.56                            | 0.08      | 0.64       |
| rs4880592  | PFKP   | G>A         | 0.47 | 0.63                       | 0.56      | 0.98       | 0.80                            | 0.09      | 0.25       |
| rs656489   | HK2    | G>A         | 0.30 | 0.29                       | 0.48      | 0.65       | 0.19                            | 0.08      | 0.87       |
| rs7231     | PDHB   | G>C         | 0.24 | 0.56                       | 0.11      | 0.25       | 0.76                            | 0.10      | 0.35       |
| rs17032801 | ENO1   | A>G         | 0.42 | 0.25                       | 0.41      | 0.75       | 0.50                            | 0.25      | 0.84       |
| rs1057034  | PFKL   | C>T         | 0.36 | 0.52                       | 0.30      | 0.33       | 0.55                            | 0.16      | 0.25       |
| rs4757650  | LDHA   | C>T         | 0.09 | 0.29                       | 0.72      | 0.35       | 0.47                            | 0.77      | 0.54       |
| rs8112853  | GAPDHS | G>C         | 0.27 | 0.56                       | 0.63      | 0.51       | 0.19                            | 0.26      | 0.13       |
| rs1053000  | PFKP   | C>T         | 0.23 | 0.92                       | 0.42      | 0.79       | 0.96                            | 0.46      | 0.73       |
| rs6489721  | GAPDH  | T>C         | 0.39 | 0.50                       | 0.10      | 0.68       | 0.51                            | 0.16      | 0.76       |
| rs7100037  | PFKP   | T>C         | 0.36 | 0.55                       | 0.63      | 0.51       | 0.19                            | 0.69      | 0.26       |
| rs12302749 | TPI1   | C>T         | 0.21 | 0.60                       | 0.43      | 0.48       | 0.41                            | 0.73      | 0.54       |
| rs2306302  | PFKP   | G>A         | 0.09 | 0.72                       | 0.22      | 0.54       | 0.48                            | 0.64      | 0.59       |
| rs4908519  | ENO1   | C>T         | 0.16 | 0.74                       | 0.22      | 0.53       | 0.20                            | 0.34      | 0.35       |
| rs1803621  | GAPDH  | C>T         | 0.49 | 0.37                       | 0.35      | 0.98       | 0.35                            | 0.51      | 0.86       |
| rs7128549  | LDHA   | C>G         | 0.36 | 0.46                       | 0.48      | 0.86       | 0.17                            | 0.52      | 0.50       |
| rs7176223  | ADPGK  | T>G         | 0.24 | 0.83                       | 0.92      | 0.83       | 0.54                            | 0.66      | 0.73       |
| rs4806173  | GAPDHS | C>G         | 0.29 | 0.46                       | 0.63      | 0.43       | 1.00                            | 0.58      | 0.82       |
| rs10492080 | PFKM   | C>T         | 0.46 | 0.38                       | 0.22      | 0.20       | 0.46                            | 0.12      | 0.16       |
| rs2956107  | PDHX   | C>T         | 0.27 | 0.17                       | 0.32      | 0.14       | 0.50                            | 0.21      | 0.29       |
| rs11064436 | TPI1   | G>C         | 0.19 | 0.35                       | 0.29      | 0.25       | 0.80                            | 0.56      | 0.69       |
| rs10181851 | PDK1   | A>G         | 0.21 | 0.61                       | 0.20      | 0.38       | 0.38                            | 0.24      | 0.25       |
| rs7248411  | GPI    | C>G         | 0.18 | 0.72                       | 0.60      | 0.63       | 0.50                            | 0.72      | 0.64       |
| rs2229626  | HK2    | C>T         | 0.46 | 0.53                       | 0.58      | 0.47       | 0.34                            | 0.92      | 0.50       |
| rs4760619  | PFKM   | A>T         | 0.23 | 0.75                       | 0.35      | 0.55       | 0.66                            | 0.57      | 0.85       |
| rs1052309  | PFKP   | G>A         | 0.19 | 0.38                       | 0.33      | 0.30       | 0.97                            | 0.96      | 0.96       |
| rs608112   | HK2    | G>A         | 0.23 | 0.57                       | 0.62      | 0.79       | 0.37                            | 0.26      | 0.79       |
| rs4806174  | GAPDHS | G>C         | 0.37 | 0.33                       | 0.80      | 0.41       | 0.68                            | 0.50      | 0.96       |

Supplementary Table 1. Continued.

| SNP ID     | Gene  | Base change | MAF  | <i>P</i> <sup>a</sup> for Overall survival |           |            | <i>P</i> <sup>a</sup> for Disease-free survival |           |            |
|------------|-------|-------------|------|--------------------------------------------|-----------|------------|-------------------------------------------------|-----------|------------|
|            |       |             |      | Dominant                                   | Recessive | Codominant | Dominant                                        | Recessive | Codominant |
| rs2073436  | PFKL  | C>G         | 0.21 | 0.95                                       | 0.80      | 0.97       | 0.84                                            | 0.76      | 0.79       |
| rs12276735 | PDHX  | G>A         | 0.11 | 0.18                                       | 0.98      | 0.35       | 0.84                                            | 0.71      | 0.92       |
| rs3807891  | PDK4  | C>G         | 0.30 | 0.62                                       | 0.17      | 0.32       | 0.62                                            | 0.73      | 0.60       |
| rs2001004  | TPI1  | A>G         | 0.46 | 0.30                                       | 0.94      | 0.49       | 0.38                                            | 0.79      | 0.48       |
| rs3732298  | HK2   | T>C         | 0.12 | 0.57                                       | 0.14      | 0.33       | 0.64                                            | 0.20      | 0.95       |
| rs8040828  | PKM   | C>A         | 0.39 | 0.57                                       | 0.75      | 0.83       | 0.22                                            | 0.70      | 0.31       |
| rs8023358  | ADPGK | A>G         | 0.22 | 0.65                                       | 0.25      | 0.95       | 0.61                                            | 0.13      | 0.33       |
| rs1346165  | ADPGK | C>T         | 0.21 | 0.96                                       | 0.39      | 0.78       | 0.41                                            | 0.17      | 0.24       |
| rs2278543  | ADPGK | G>A         | 0.46 | 0.58                                       | 0.62      | 0.95       | 0.63                                            | 0.65      | 0.57       |

MAF, minor allele frequency

<sup>a</sup> *P*-values calculated using multivariate Cox proportional hazard models, adjusted for age, gender, smoking status, tumor histology, pathologic stage, and adjuvant therapy.

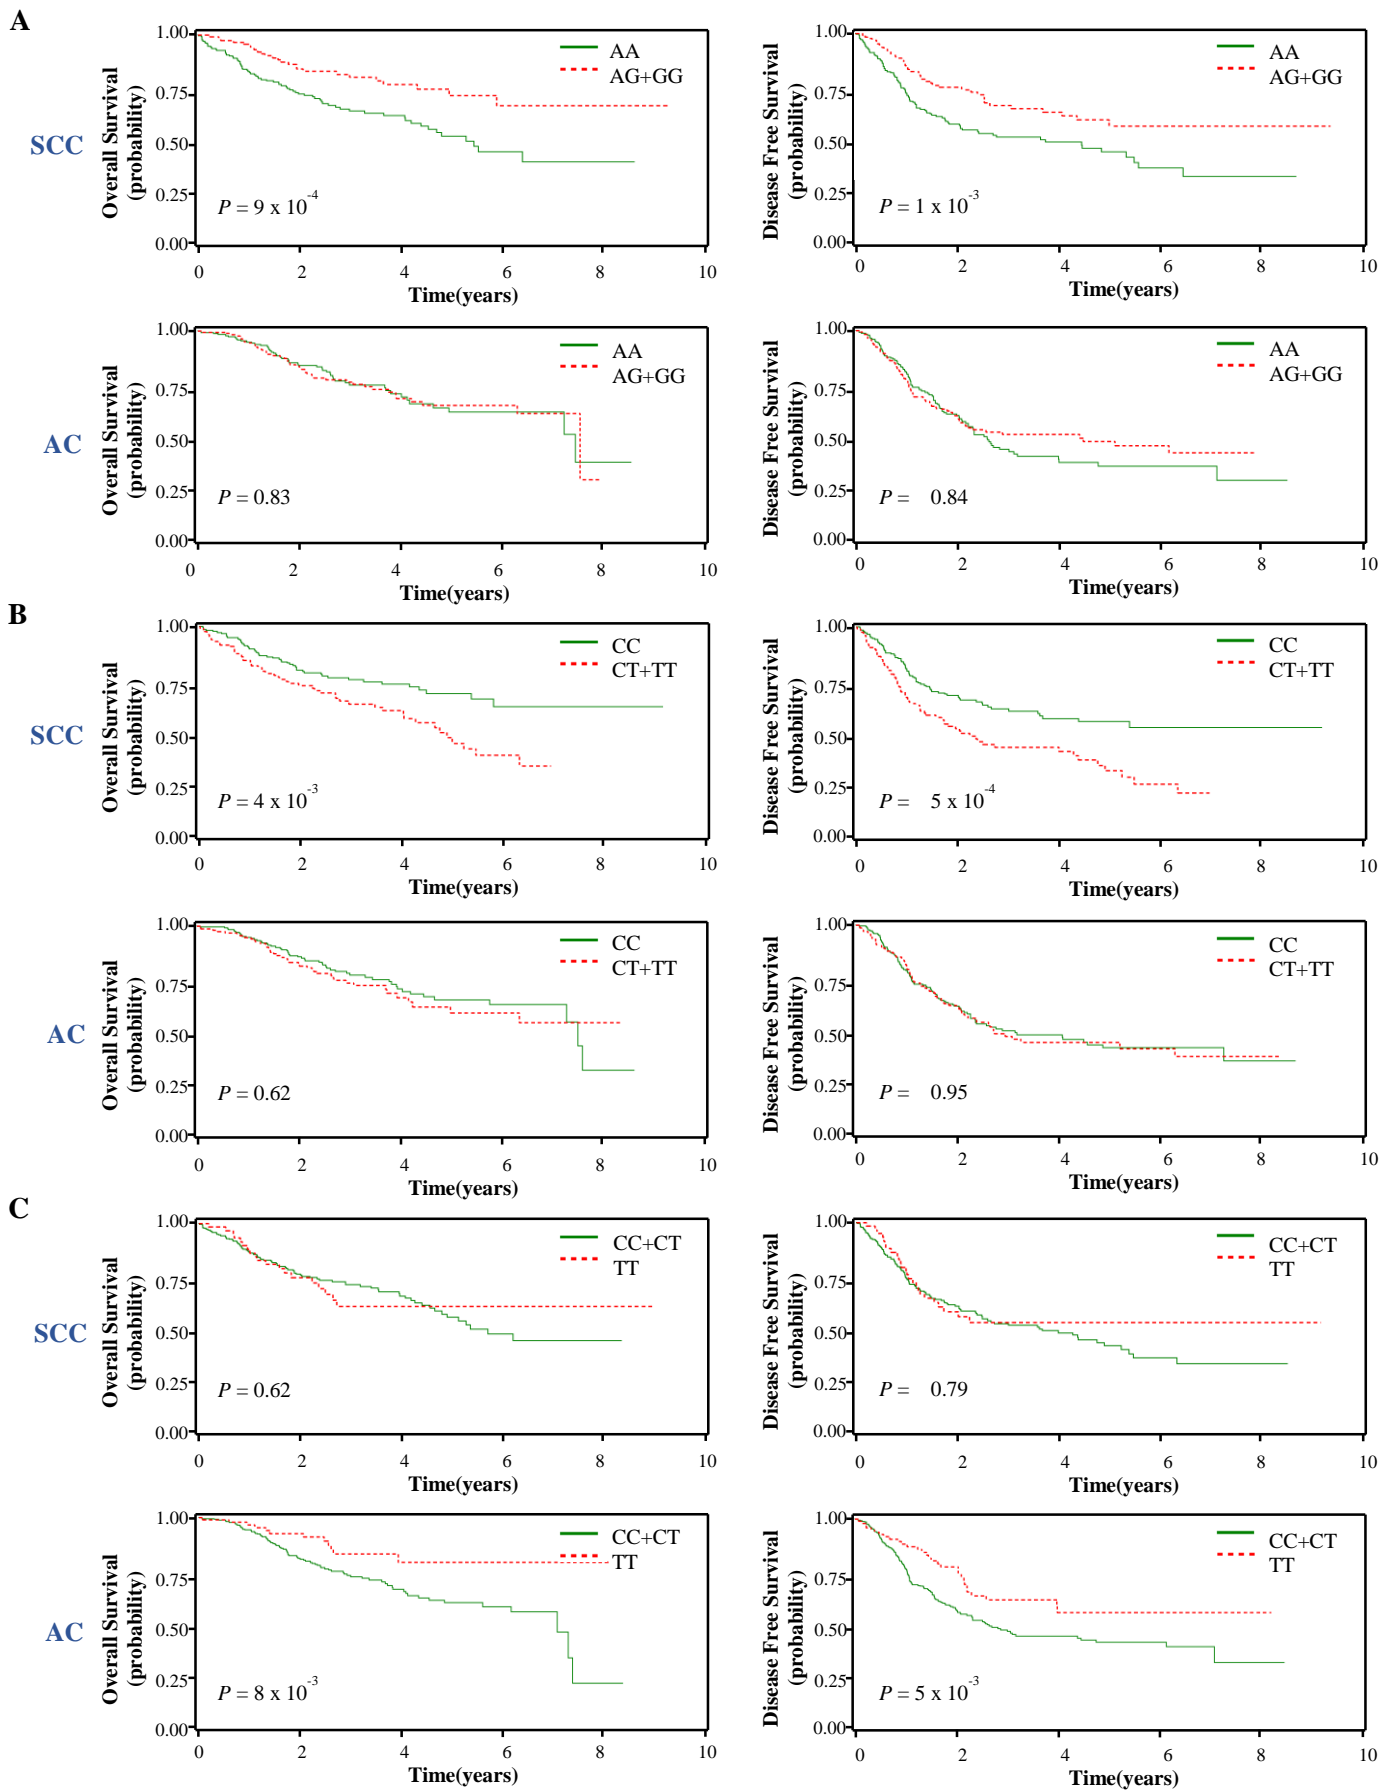

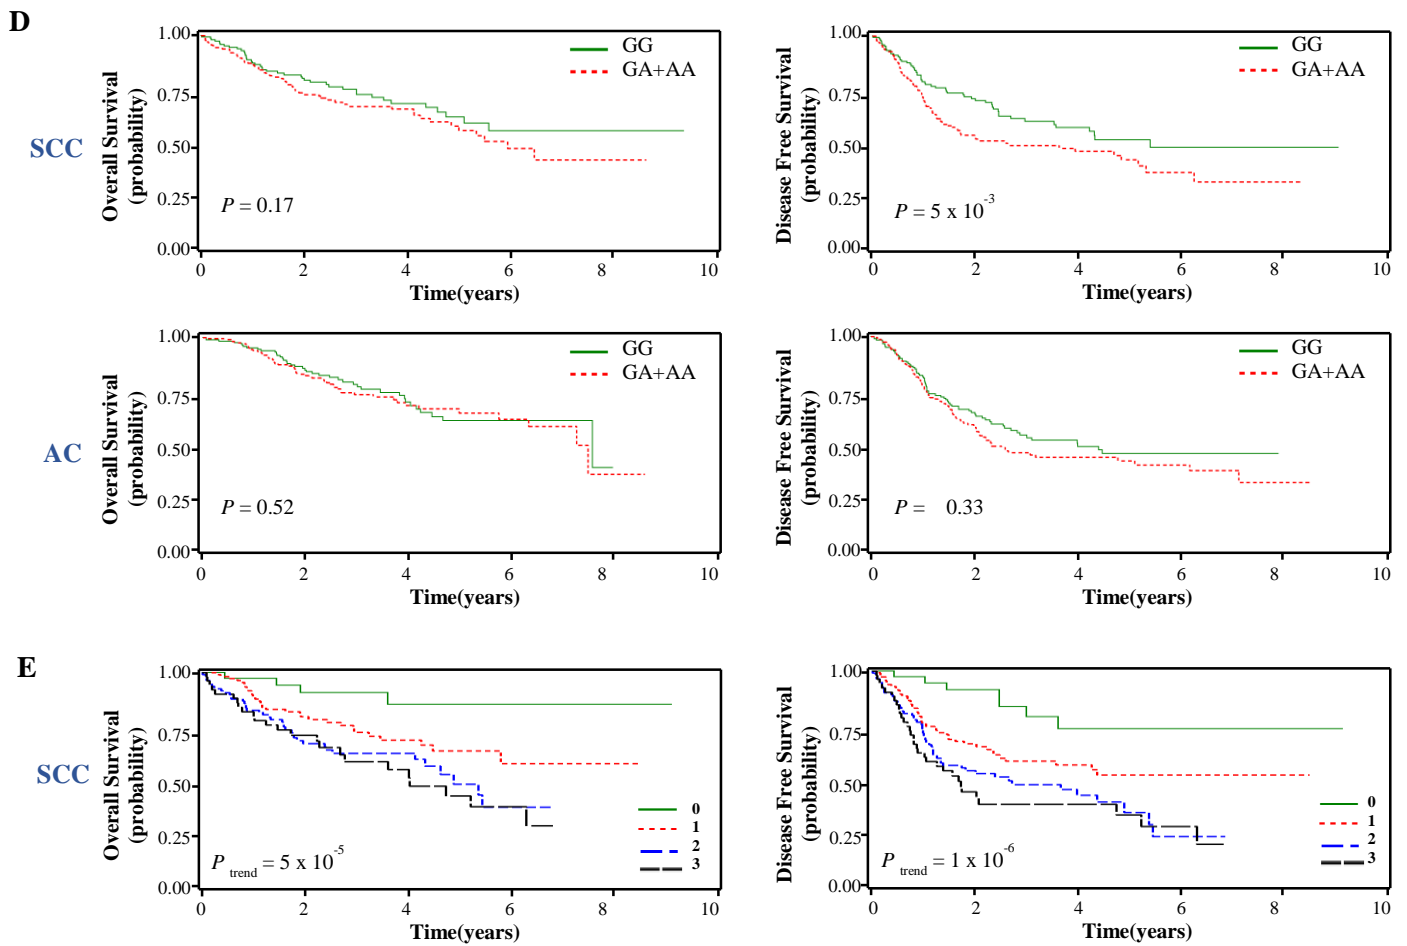

**Supplementary Figure 1.** Overall survival and disease free survival curves according to *ENO1* rs2274971A>G (A), *PFKM* rs11168417C>T (B), *PFKP* rs1132173C>T (C), and *PDK2* rs3785921G>A (D) genotypes in SCC and AC, and according to the number of bad genotypes of *ENO1* rs2274971A>G, *PFKM* rs11168417C>T, and *PDK2* rs3785921G>A (E).  $P$  values in the multivariate Cox hazard models. SCC, squamous cell carcinoma; AC, adenocarcinoma.
